# Supplementary material for: Fabrication of Novel Bio-Composites Based on Rice Milk for the Delivery of Capsaicinoids as Green Herbicides against Cynodon dactylon Weed
Source: MDPI journal article supplement (doi:10.3390/cryst12081048), 2022-07-28
Supplement: s1 [file s1]

Archive with 1 entries (1 files):
- crystals-1832237-supplementary.pdf
