# Supplementary material for: Fabrication of Novel Bio-Composites Based on Rice Milk for the Delivery of Capsaicinoids as Green Herbicides against Cynodon dactylon Weed
Source: MDPI journal article supplement (doi:10.3390/cryst12081048), 2022-07-28
Supplement: s1 [file s1 › crystals-1832237-supplementary.pdf]

# Fabrication of Novel Bio-Composites Based on Rice Milk for the Delivery of Capsaicinoids as Green Herbicides against *Cynodon dactylon* Weed

Gianluca Viscusi <sup>1,\*</sup>, Elena Lamberti <sup>1</sup>, Giovanna Aquino <sup>2</sup>, Manuela Rodriquez <sup>2</sup> and Giuliana Gorrasi <sup>1</sup>

<sup>1</sup> Department of Industrial Engineering, University of Salerno, Via Giovanni Paolo II, 132, 84084 Fisciano, SA, Italy; ellamberti@unisa.it (E.L.); ggorrasi@unisa.it (G.G.)

<sup>2</sup> Department of Pharmacy, University of Salerno, Via Giovanni Paolo II, 132, 84084 Fisciano, SA, Italy; gaquino@unisa.it (G.A.); mrodriquez@unisa.it (M.R.)

\* Correspondence: gviscusi@unisa.it

## Supporting Information

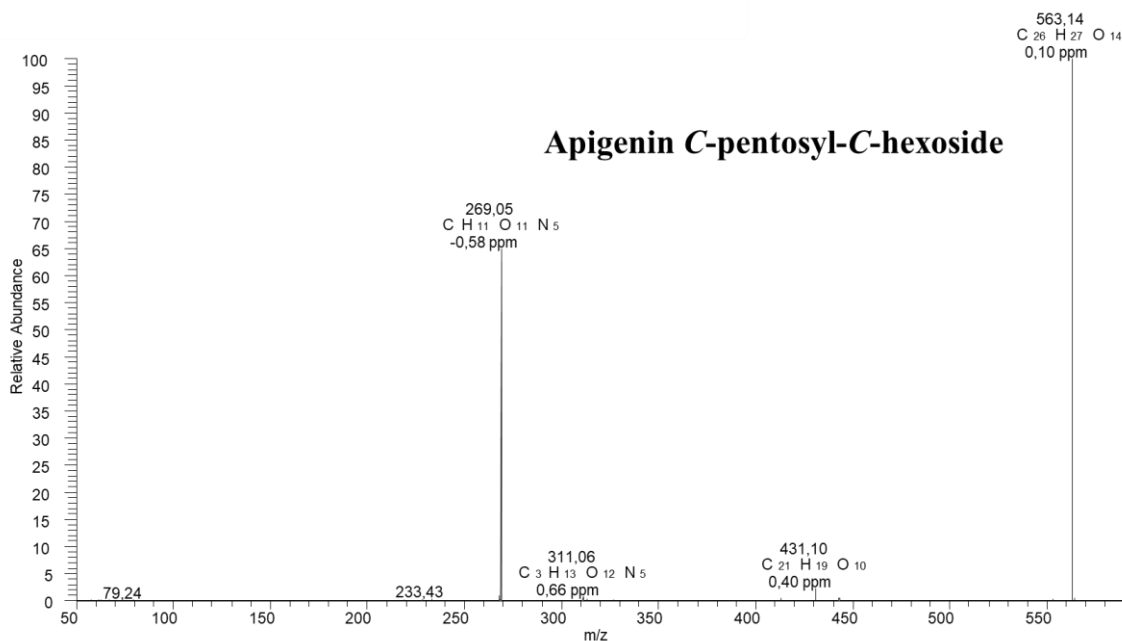

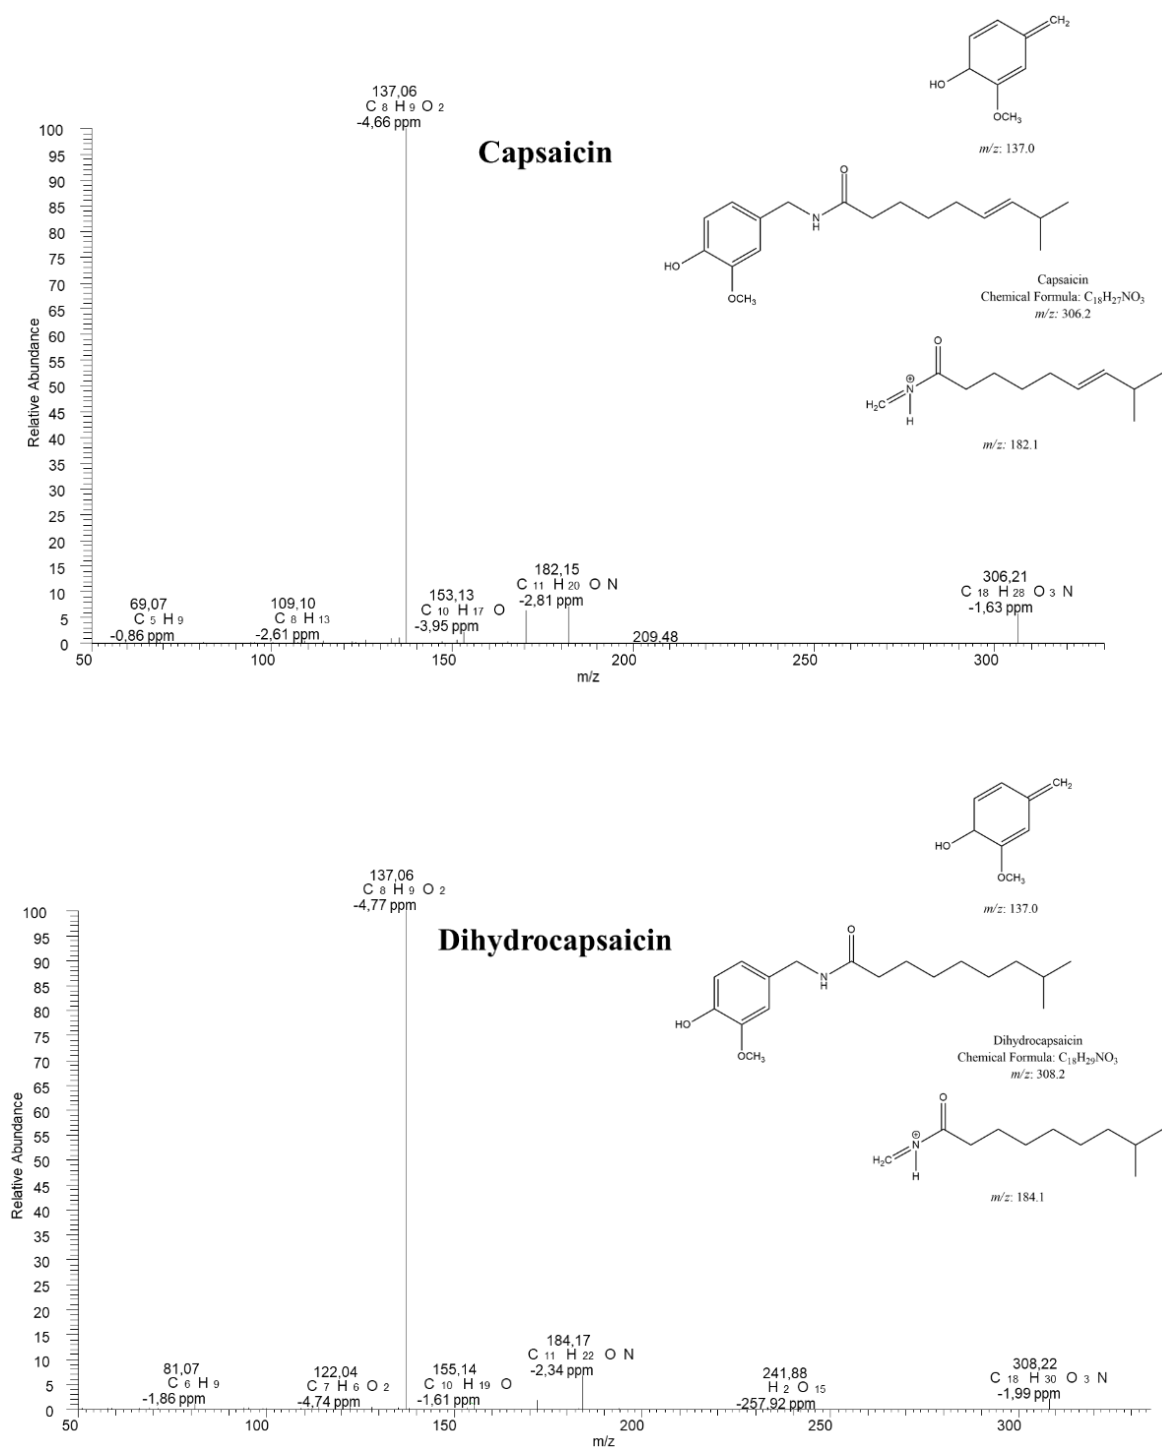

**Figure S1.** MS/MS spectra of investigated compounds extracted by chili pepper.

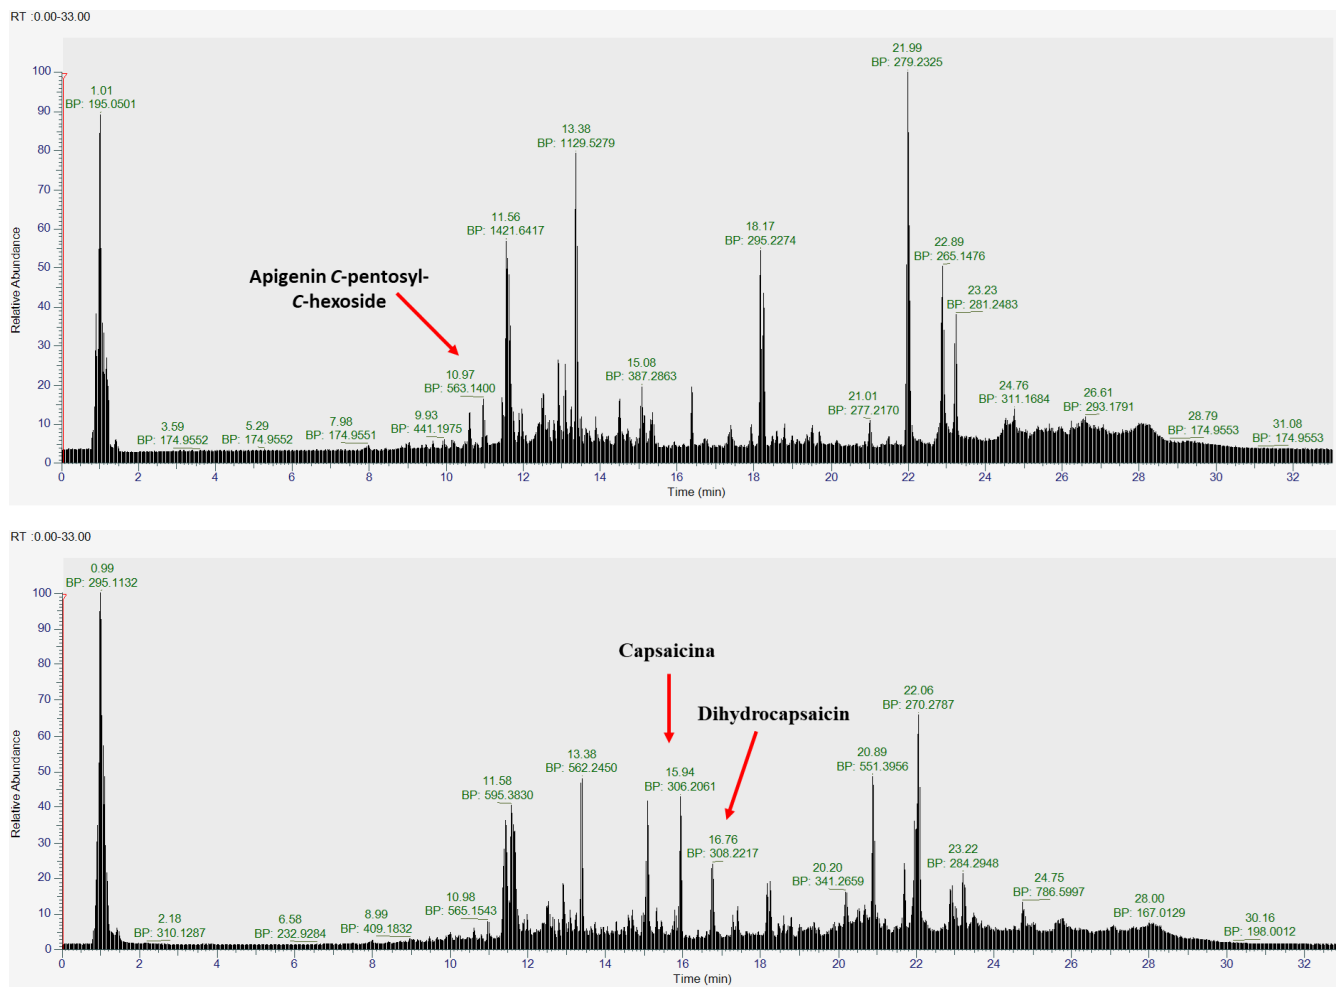

**Figure S2.** TICs of chili pepper extract obtained by LC-MS analysis (ESI- on the top and ESI+ on the bottom).

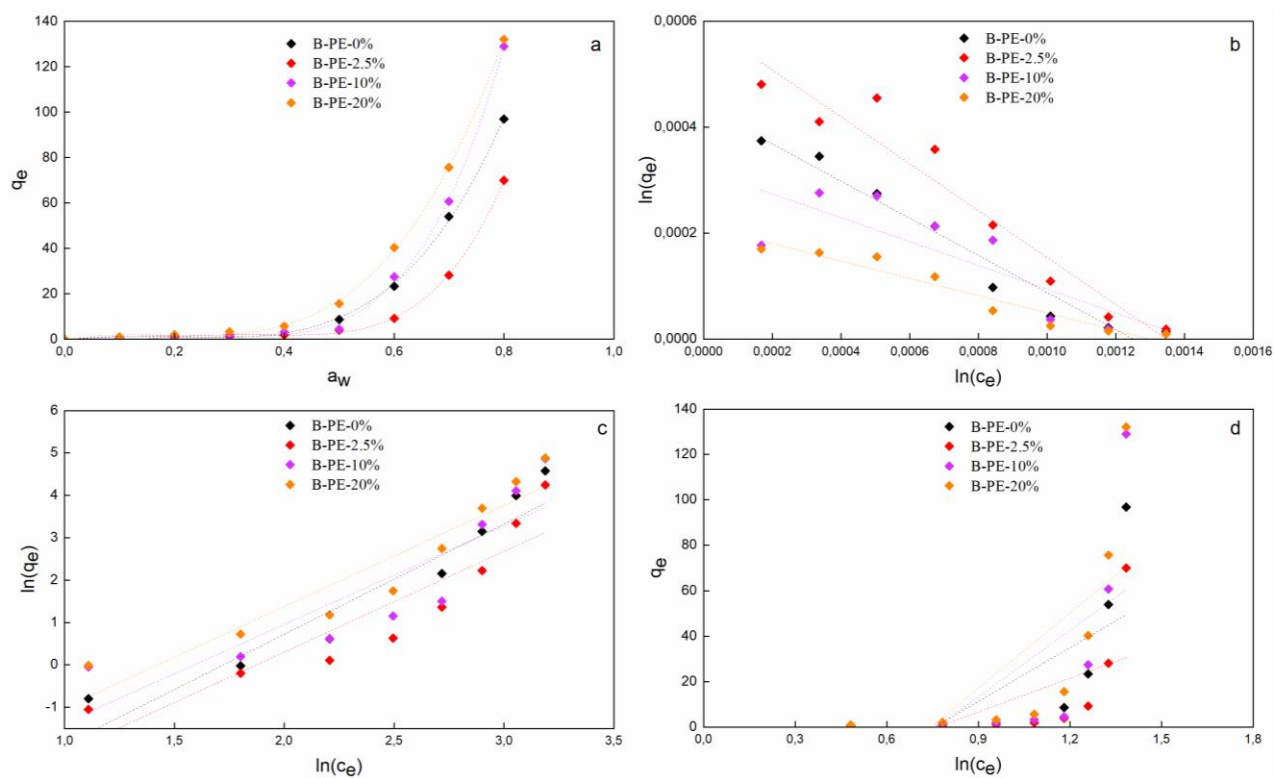

**Figure S3.** Sorption data fitted by isotherm models: a) polynomial; b) Langmuir; c) Freundlich and d) Temkin.
